# Supplementary material for: Hollow microspherical Bi2MoO6/Zn–Ti layered double hydroxide heterojunction for efficient visible-light photocatalytic degradation of organic contaminants
Source: Royal Society of Chemistry journal article supplement (doi:10.1039/d1nj05008g), 2021-12-15
Supplement: d1nj05008g1.pdf [file d1nj05008g1.pdf]

*Supporting Information*

**Hollow microspherical Bi<sub>2</sub>MoO<sub>6</sub>/Zn-Ti layered double hydroxide  
heterojunction for efficient visible-light photocatalytic degradation of  
organic contaminants**

Xiu-Jie Yang,\* Lunan Wu, Ruona Hu, Junqi Xing, Guohao Zhou, Shufen Lu, Jun Wu, Peng Li,  
Dong Liu\*

State Key Laboratory of Heavy Oil Processing, School of Chemical Engineering, China University  
of Petroleum (East China), Qingdao, Shandong 266580, China

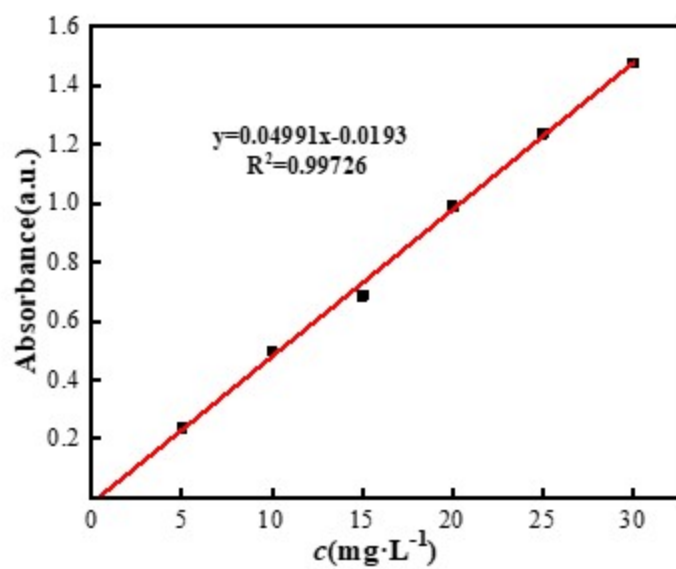

Figure S1 Standard curve of RhB solution.

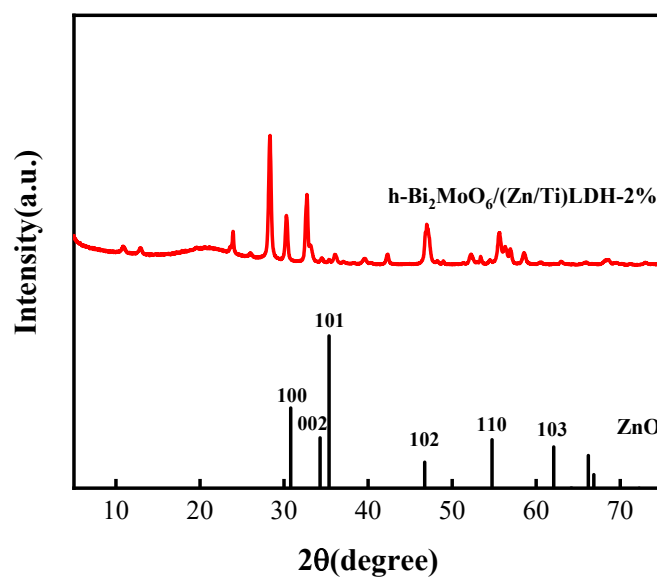

Figure S2 XRD pattern of  $\text{h-Bi}_2\text{MoO}_6/(\text{Zn/Ti})\text{LDH-2\%}$ .

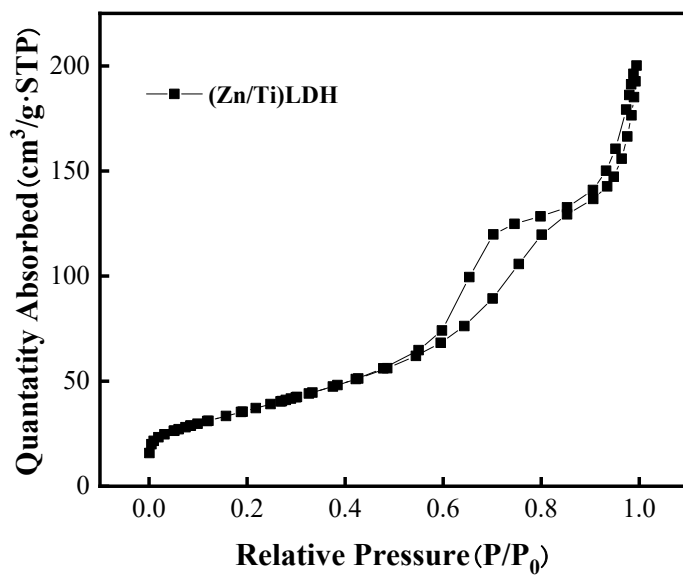

**Figure S3** N<sub>2</sub> adsorption-desorption isotherm of (Zn/Ti)LDH.

Table S1. The surface area, pore volume and pore diameter of samples.

| Sample                                              | Surface Area<br>(m <sup>2</sup> ·g <sup>-1</sup> ) | Pore Volume (cm <sup>3</sup> ·g <sup>-1</sup> ) | Pore Diameter<br>(nm) |
|-----------------------------------------------------|----------------------------------------------------|-------------------------------------------------|-----------------------|
| h-Bi <sub>2</sub> MoO <sub>6</sub>                  | 16.0                                               | 0.142                                           | 30.5                  |
| h-Bi <sub>2</sub> MoO <sub>6</sub> /(Zn/Ti)LDH-1.5% | 17.7                                               | 0.106                                           | 19.3                  |
| h-Bi <sub>2</sub> MoO <sub>6</sub> /(Zn/Ti)LDH-2%   | 20.3                                               | 0.172                                           | 17.0                  |
| h-Bi <sub>2</sub> MoO <sub>6</sub> /(Zn/Ti)LDH-3%   | 22.6                                               | 0.095                                           | 15.1                  |
| h-Bi <sub>2</sub> MoO <sub>6</sub> /(Zn/Ti)LDH-4%   | 27.1                                               | 0.129                                           | 16.5                  |
| (Zn/Ti)LDH                                          | 134.3                                              | 0.310                                           | 7.2                   |

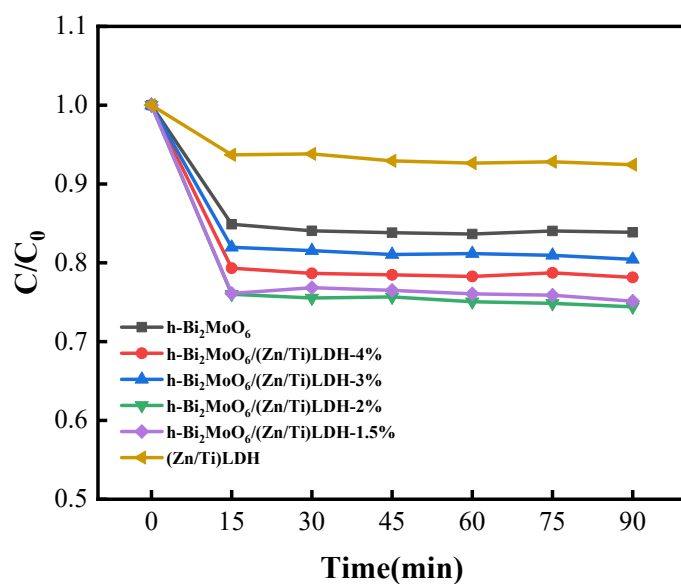

**Figure S4** Adsorption performance of the as-prepared samples.

**Table S2.** Photodegradation performance of the as-prepared samples compared with other related photocatalysts.

| Sample                                                               | Light source         | Catalyst concentration (g·L <sup>-1</sup> ) | Pollutant concentration (mg·L <sup>-1</sup> ) | Degradation time(min) | Degradation rate(%) | Ref. |
|----------------------------------------------------------------------|----------------------|---------------------------------------------|-----------------------------------------------|-----------------------|---------------------|------|
| Bi <sub>2</sub> MoO <sub>6</sub> /Ag <sub>2</sub> O                  | 300W Xe (λ > 420 nm) | 0.6                                         | 10                                            | 60                    | 95                  | [1]  |
| Ag/Bi <sub>2</sub> MoO <sub>6</sub>                                  | 300W Xe (λ > 420 nm) | 1                                           | 5                                             | 210                   | 97                  | [2]  |
| PtCo-Bi <sub>2</sub> MoO <sub>6</sub>                                | 300W Xe (λ > 420 nm) | 0.5                                         | 10                                            | 30                    | 95                  | [3]  |
| Ag/Ag <sub>3</sub> PO <sub>4</sub> /Bi <sub>2</sub> MoO <sub>6</sub> | 300W Xe (λ > 420 nm) | 0.2                                         | 5                                             | 80                    | 100                 | [4]  |
| ZnFe <sub>2</sub> O <sub>4</sub> /Bi <sub>2</sub> MoO <sub>6</sub>   | 150W Xe (λ > 420 nm) | 1                                           | 10                                            | 240                   | 99.9                | [5]  |
| BiFeO <sub>3</sub> /Bi <sub>2</sub> MoO <sub>6</sub>                 | 150W Xe (λ > 420 nm) | 1                                           | 10                                            | 300                   | 93.84               | [6]  |

|                                                                                    |                               |     |    |     |      |           |
|------------------------------------------------------------------------------------|-------------------------------|-----|----|-----|------|-----------|
| $\delta$ -Bi <sub>2</sub> O <sub>3</sub> /Bi <sub>2</sub> MoO <sub>6</sub>         | 500W Xe                       | 0.6 | 5  | 180 | 100  | [7]       |
| Fe <sub>3</sub> O <sub>4</sub> /SiO <sub>2</sub> /Bi <sub>2</sub> MoO <sub>6</sub> | 300W Xe ( $\lambda > 420$ nm) | 1   | 10 | 120 | 100  | [8]       |
| SiO <sub>2</sub> /Bi <sub>2</sub> MoO <sub>6</sub>                                 | 500W Xe ( $\lambda > 420$ nm) | 0.2 | 5  | 60  | 100  | [9]       |
| Cl-doped Bi <sub>2</sub> MoO <sub>6</sub>                                          | 300W Xe ( $\lambda > 420$ nm) | 1   | 5  | 160 | 99.5 | [10]      |
| Bi <sub>2</sub> MoO <sub>6</sub> /(Zn/Ti)LDH                                       | 500W Xe ( $\lambda > 400$ nm) | 1   | 10 | 60  | 100  | This work |

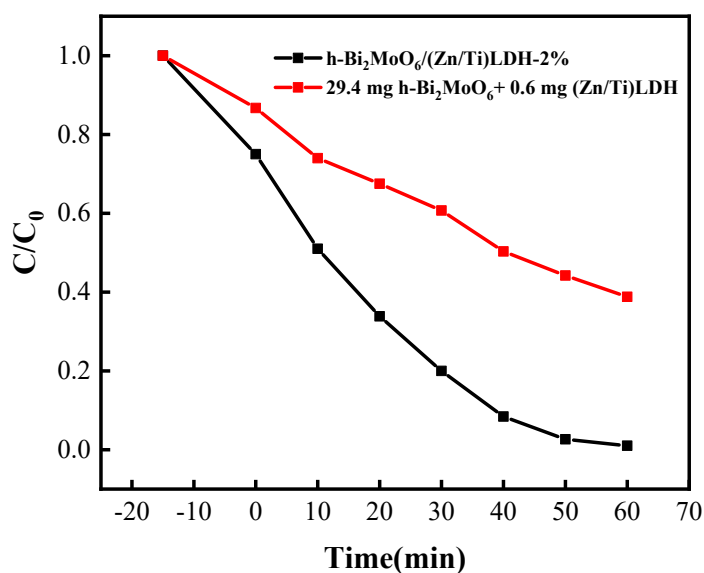

**Figure S5** Photocatalytic performance of h-Bi<sub>2</sub>MoO<sub>6</sub>/(Zn/Ti)LDH-2% and the mixture.

## References

- [1] J. Zhang, H. Liu, Z. Ma, J. Mol. Catal. A-Chem., 2016, 424, 37.
- [2] P. Suebsom, A. Phuruangrat, S. Suwanboon, S. Thongtem, T. Thongtem, Inorg. Chem. Commun., 2020, 119, 108120.
- [3] Y. Lu, X. Li, C. Han, L. Ge, S. Fang, P Qiu, RSC Adv., 2016, 6, 84485.
- [4] X. Lin, J. Hou, S. Jiang, Z. Liu, M. Wang, G. Che, RSC Adv., 2015, 5, 104815.

- [5] C. Zhao, C. Shao, X. Li, X. Li, R. Tao, X. Zhou, Y. Liu, *J. Alloys Compd.*, 2018, 747, 916.
- [6] R. Tao, C. Shao, X. Li, X. Li, S. Liu, S. Yang, C. Zhao, Y. Liu, *J. Colloid Interface Sci.*, 2018, 529, 404.
- [7] Y. Yin, F. Li, Q. Zhan, D. Jiang, R. Chen, *Mater. Res. Bull.*, 2018, 103, 47.
- [8] X. Hou, Y. Tian, X. Zhang, S. Dou, L. Pan, W. Wang, Y. Li, J. Zhao, *J. Alloys Compd.*, 2015, 638, 214.
- [9] X. Lin, X. Guo, D. Liu, Q. Wang, H. Zhai, L. Chang, *Mater. Res. Bull.*, 2015, 63, 72.
- [10] A. Phuruangrat, P. Dumrongrojthanath, B. Kuntalue, S. Thongtem, T. Thongtem, *Mater. Lett.*, 2017, 196, 256.
